1 **Inhibition of histone deacetylase 1 or 2 reduces microglia activation through a gene**  
2 **expression independent mechanism.**

3

4

5 Benjamin S. Durham<sup>1</sup>, Ronald Grigg<sup>2</sup> and Ian C. Wood<sup>1</sup>

6

7

8 <sup>1</sup>School of Biomedical Sciences, and <sup>2</sup> School of Chemistry, University of Leeds, Leeds LS2  
9 9JT, UK.

10

11

12 To whom correspondence should be addressed: Ian C Wood, Tel +44 (0)113 3437922. Fax +44  
13 (0)113 3431407. E-mail: [i.c.wood@leeds.ac.uk](mailto:i.c.wood@leeds.ac.uk)

14 Running title. HDAC1 and 2 regulate microglia activation

15

16 Number of pages: 29

17 Number of figures: 4

18 Number of words: Abstract – 194. Introduction – 567. Discussion – 1298

19 Conflict of Interest: None

20

21 Acknowledgements: The work was supported by a Biotechnology and Biological Sciences  
22 Research Council (BBSRC) studentship awarded to BSD. The authors declare no competing  
23 financial interests.

24

25 **Abstract**

26 Histone deacetylase (HDAC) inhibitors prevent neural cell death in *in vivo* models of cerebral  
27 ischaemia, brain injury and neurodegenerative disease. One mechanism by which HDAC  
28 inhibitors may do this is by suppressing the excessive inflammatory response of chronically  
29 activated microglia. However, the molecular mechanisms underlying this anti-inflammatory  
30 effect and the specific HDAC responsible are not fully understood. Recent data from *in vivo*  
31 rodent studies has shown that inhibition of class I HDACs suppresses neuroinflammation and  
32 is neuroprotective. In our study we have identified that selective HDAC inhibition with  
33 inhibitors apicidin, MS-275 or MI-192, or specific knockdown of HDAC1 or 2 using siRNA,  
34 suppresses the expression of cytokines interleukin-6 (IL-6) and tumour necrosis factor-alpha  
35 (TNF- $\alpha$ ) in BV2 murine microglia activated with lipopolysaccharide (LPS). Furthermore, we  
36 found that in the absence of HDAC1, HDAC2 is upregulated and these increased levels are  
37 compensatory, suggesting these two HDACs have redundancy in regulating the inflammatory  
38 response of microglia. Investigating the possible underlying anti-inflammatory mechanisms  
39 suggests an increase in protein expression is not important. Taken together, this study supports  
40 the idea that inhibitors selective towards HDAC1 or HDAC2, may be therapeutically useful for  
41 targeting neuroinflammation in brain injuries and neurodegenerative disease.

42

43 **Significance Statement**

44 The number of patients suffering a stroke or a neurodegenerative disease, such as Alzheimer's  
45 is increasing. These conditions are severely debilitating and are leading causes of mortality,  
46 with neural cell death and loss of brain tissue being a major feature. A number of mechanisms  
47 contribute to neuronal death, including inflammation in the brain, but we still lack clinical  
48 therapies to inhibit this. The work presented here provides further insight into potential  
49 molecular therapeutic targets called histone deacetylases (HDACs), which are thought to

50 contribute to neural cell death by promoting inflammation. We show that down regulation of  
51 HDAC1 and 2 is sufficient to reduce this inflammatory response. Our findings have clinical  
52 relevance because they identify HDAC1 and 2 as promising targets for therapy.

53

## 54 **INTRODUCTION**

55

56 Microglia are the innate immune cells of the brain that are responsible for the excessive and  
57 chronic neuroinflammatory response known to contribute to the pathogenesis of brain injury  
58 and disease (Block et al., 2007; Glass et al., 2010). Inhibitors of histone deacetylases (HDACs)  
59 reduce the inflammatory response of isolated microglia to stimulants such as  
60 lipopolysaccharide (LPS) (Suuronen et al., 2003; Peng et al., 2005; Chen et al., 2007; Faraco  
61 et al., 2009; Suh et al., 2010; Kannan et al., 2013). When delivered *in vivo*, HDAC inhibitors  
62 (HDACi) reduce neuroinflammation, promote neuroprotection and improve functional  
63 outcomes in models of cerebral ischaemia (Kim et al., 2007; Sinn et al., 2007; Xuan et al.,  
64 2012; Kim and Chuang, 2014), traumatic brain injury (Zhang et al., 2008; Shein and Shohami,  
65 2011) and encephalomyelitis (Camelo et al., 2005; Zhang et al., 2010). Therapies for treating  
66 brain injury and disease are lacking, but these studies highlight a role for HDACs in  
67 neuroinflammation and suggest they are appropriate targets to inhibit.

68

69 The mechanism by which HDAC inhibition is anti-inflammatory is not understood, but we  
70 know HDACs remove acetyl groups from lysine residues on proteins including, histones  
71 (Strahl and Allis, 2000), enzymes and transcription factors (Glozak et al., 2005; Yao and Yang,  
72 2011). As a consequence, deacetylation of histones promotes a compact chromatin structure  
73 and reduces gene expression, and deacetylation of specific lysine residues on transcription  
74 factors can modulate their activity (Gu and Roeder, 1997; Boyes et al., 1998). The identity of

75 which acetylated proteins are responsible for the anti-inflammatory responses observed when  
76 using HDAC inhibitors is unclear.

77

78 There are 18 mammalian HDAC isoforms (class I HDACs (1, 2, 3 and 8), class II HDACs (4-  
79 7, 9 and 10), class III sirtuins (1-7) and the class IV HDAC11) and the majority of studies to  
80 date have focused on using non-selective HDAC inhibitors such as suberoylanilide hydroxamic  
81 acid (SAHA), trichostatin-A (TSA) and valproic acid (VPA) which inhibit the majority of these  
82 isoforms. As a result, we do not know which HDACs modulate the microglial inflammatory  
83 response and how inhibition of these leads to the acetylation of specific proteins to reduce  
84 neuroinflammation. Recent studies have begun to address these questions and have shown that  
85 selective inhibition of class I HDACs 1, 2 and 3 with the HDAC inhibitor MS-275 (Hu et al.,  
86 2003; Simonini et al., 2006; Beckers et al., 2007; Khan et al., 2008) can reduce  
87 neuroinflammation in a mouse model of Alzheimer's disease (Zhang and Schluesener, 2013)  
88 and the inflammatory response of macrophages to the inflammatory stimulant LPS (Jeong et  
89 al., 2014).

90

91 In our study, we have used selective HDAC inhibitors and siRNA mediated knockdown to  
92 identify HDAC1 and HDAC2 as the key HDACs involved in the neuroinflammatory response  
93 of microglia. We show that selective class I HDAC inhibitors and siRNA to specifically  
94 knockdown HDAC1 and 2, both suppressed the expression of cytokines in BV2 murine  
95 microglia. Knockdown of HDAC1 alone resulted in a compensatory increase in the levels of  
96 HDAC2 and did not suppress cytokine expression, showing these two enzymes have  
97 redundancy in the neuroinflammatory response. We show that the HDACi are effective in the  
98 absence of new protein synthesis suggesting that the anti-inflammatory mechanism of HDACi  
99 does not involve increased protein expression. This identification suggests that HDAC

100 selective inhibitors may be therapeutically useful for targeting microglia and  
101 neuroinflammation, in brain injury and disease by modulating the acetylation levels and  
102 function of non-histone protein(s).

## 103 MATERIALS & METHODS

104

### 105 CELL CULTURE

106

107 BV2 murine microglia were cultured in Dulbecco's Modified Eagle's Medium (DMEM) high  
108 glucose AQmedia™ (Sigma-Aldrich) supplemented with 10% v/v foetal bovine serum (FBS,  
109 PAA Cell Culture Company) and 100U penicillin/100 µg streptomycin (Sigma-Aldrich). Cells  
110 were seeded into 6-well plates at either 350,000 or 500,000 cells/well and 24-well plates at  
111 175,000 cells/well. The cells were cultured for 24 hours before treatment. BV2 cells were  
112 treated with vehicle control, or HDAC inhibitor with or without 500 ng/mL lipopolysaccharide  
113 (LPS, Sigma) and cells harvested after 6 or 24 hours. Inhibitors used were; apicidin (Sigma-  
114 Aldrich), MI192 (School of Chemistry, University of Leeds), MS-275 (Cayman Chemicals),  
115 SAHA (Cayman Chemicals) all dissolved in DMSO and valproic acid (VPA, Sigma-Aldrich)  
116 dissolved in phosphate buffered saline (PBS, Oxoid). For pre-treatment experiments, BV2 cells  
117 were treated with vehicle control or appropriate drugs for 24 hours before the addition of 500  
118 ng/mL LPS for a further 6 hours.

119

### 120 CELL TRANSFECTION

121

122 BV2 microglia seeded into 6-well plates were washed with 1 mL PBS and maintained in 1 mL  
123 Opti-MEM® (Gibco) throughout the transfection procedure. Cells were transfected with 50  
124 pmoles of Silencer® Select Negative Control siRNA (Ambion) or Silencer® Select Pre-  
125 designed siRNA targeted against HDAC1 (id: s119557, Ambion) or HDAC2 (id: s67417,  
126 Ambion) as follows. For each well, 3 µL of Lipofectamine™ 2000 (Invitrogen) was dissolved  
127 in 100 µL of Opti-MEM® and 1 µL of 50 µM siRNA was dissolved in 100 µL of Opti-Mem®,

128 these were incubated for 5 minutes before combining and incubating for a further 20 minutes  
129 at room temperature. Afterwards, 200  $\mu$ L of this mix was added to the well, followed by  
130 incubation at 37°C in a humid atmosphere with 5% CO<sub>2</sub> for 4 hours. This was then removed  
131 and the cells were cultured in 3 mL DMEM high glucose AQmedia™ supplemented with 1%  
132 v/v FBS and 100U penicillin/100  $\mu$ g streptomycin for 24 hours. Medium was then changed and  
133 the cells were cultured for a further 24 hours before treating with 500 ng/mL LPS for 6 hours.

134

#### 135 WHOLE CELL PROTEIN EXTRACTION

136

137 BV2 cells seeded into 6-well plates were washed with 1 mL PBS and scraped into 250  $\mu$ L ice-  
138 cold RIPA Buffer [10 mM Tris-HCL pH 8.0, 1 mM EDTA, 1% Triton X-100, 0.1% sodium  
139 deoxycholate, 0.1% sodium dodecyl sulfate (SDS), 140 mM NaCl, 1 mM PMSF (all from  
140 Sigma-Aldrich)], then incubated for 30 minutes on ice. The lysate was clarified by  
141 centrifugation at 13400  $\times$  g for 20 minutes at 4°C and the supernatant containing proteins was  
142 collected and the concentration determined using the Bicinchoninic Acid (BCA) protein assay  
143 (Sigma-Aldrich).

144

#### 145 HISTONE PROTEIN EXTRACTION

146

147 Histone proteins were extracted from BV2 microglia cultured in 6-well plates. Cells were  
148 washed with 1 mL PBS then scraped into 1 mL ice-cold PBS and pelleted by centrifugation at  
149 400  $\times$  g for 5 minutes at room temperature. The cell pellet was resuspended in 400  $\mu$ L of Triton  
150 Lysis Buffer per 1  $\times$  10<sup>7</sup> cells [0.5% v/v Triton X-100, 2 mM PMSF, 0.02% w/v NaN<sub>3</sub> (all from  
151 Sigma-Aldrich) and PBS] and incubated on ice for 10 minutes. Lysed cells were centrifuged at  
152 6600  $\times$  g for 10 minutes at 4°C. The pellet was resuspended in half the volume of Triton Lysis

153 Buffer used earlier then centrifuged at 6600 × g for 10 minutes at 4°C. The nuclei pellet was  
154 resuspended in 50 µL of 200 mM HCl (Acros Organics) and histone proteins were extracted  
155 overnight at 4°C. The samples were centrifuged at 6600 × g for 10 minutes at 4°C and the  
156 supernatant containing histone proteins was collected and the protein concentration determined  
157 using the Bradford protein assay (Sigma-Aldrich).

158

#### 159 WESTERN BLOTTING

160

161 Protein samples (10 µg) were separated by sodium dodecyl sulfate polyacrylamide gel  
162 electrophoresis (SDS-PAGE) and wet-transferred onto PVDF membrane at 30V for 30  
163 minutes. The membranes were blocked overnight at 4°C with blocking solution [5% w/v nonfat  
164 dried milk powder, 0.1% v/v Tween® 20 (both from Sigma-Aldrich) and PBS] and then  
165 incubated with either; Anti-HDAC1 [1:2000, rabbit polyclonal, Abcam], Anti-HDAC2  
166 [1:2000, rabbit polyclonal, Abcam], Anti-HDAC3 [1:2000, rabbit polyclonal, Abcam], Anti-  
167 β-actin [1:10,000, mouse monoclonal, Sigma], Anti-Histone H3 [1:1000, mouse monoclonal,  
168 Cell Signaling], Anti-acetyl Histone H3 Lysine 9 [1:1000, rabbit polyclonal, Millipore] or Anti-  
169 acetyl Histone H4 Pan-lysine [1:10,000, rabbit polyclonal, Millipore] (all dissolved in blocking  
170 solution) for 1 hour at room temperature. Membranes were washed with PBS-0.1% v/v  
171 Tween® 20 and incubated with an appropriate secondary antibody; Goat-Anti-Rabbit IgG-  
172 horseradish peroxidase (HRP) linked [1:2000, Cell Signaling] or Goat-Anti-Mouse IgG-HRP  
173 linked [1:2000, Cell Signaling] for 1 hour at room temperature followed by washing as before.  
174 Membranes were incubated with an enhanced chemiluminescence (ECL) substrate  
175 (Amersham) and exposed to photographic film, a Fujifilm LAS-3000 imaging system or a  
176 cDigit® Scanner (LICOR). The intensity of each band was quantified and normalized to the β-  
177 actin loading control.



178

179 RNA EXTRACTION, REVERSE TRANSCRIPTION AND QUANTITATIVE RT-PCR

180

181 Total RNA was extracted from BV2 microglia cells using TRI Reagent® (Sigma-Aldrich) as per

182 manufacturer's instructions, resuspended in Tris-EDTA (TE), pH 7.5 and concentrations

183 determined using a NanoDrop 2000c (Thermo Scientific). RNA (2.5 µg) was primed for reverse

184 transcription at 65°C for 5 minutes with 1.25 µL of Oligo(dT)15 primers (0.5 µg/µL, Promega),

185 1.25 µL of Random primers (0.5 µg/µL, Promega) in a final volume of 32.5 µL. cDNA was

186 synthesised at 37°C for 60 min using M-MLV Reverse Transcriptase, RNase H Minus (200 U/µL

187 and RNasin® Plus, Promega) with 2 mM dNTP (Bioline) in a final reaction volume of 50 µL.

188 Quantitative PCR (qPCR) reactions were carried out in duplicate using a Rotor Gene 6000 PCR

189 Analyzer (Corbett) using SensiMix™ SYBR® & Fluorescein (Bioline). Each reaction comprised

190 of 50 or 100 ng of sample cDNA, 300 nM of each gene primer, in a final volume of 20 µL.

191 Primers used were: IL-6 5'-CCCAACTTCCAATGCTCTCC and 5'-ACATGGGATTCCA-

192 CAAAC, TNF-α 5'-TGAACTTCGGGGTGATCG and 5'-GGGCTTGTCACCTCGAGTTTT ,

193 U6 5'- CCGCTTCGGCAGCACA and 5'-AACGCTTCACGAATTTGCGT, HDAC1 5'- GA-

194 CCGCAAGTGTGTGG and 5'-GAGCAACATTCCGGATGGTG, HDAC2 5'- CAACAGAT-

195 CGCGTGATGACC and 5'-CCCTTTCCAGCACCAATATCC, HDAC3 5'-GACGTGCAT-

196 CGTGCTCCAGT and 5'-ACATTCCCCATGTCCTCGAAT. A RNA control (no reverse

197 transcription) and a no template control were also run. PCR conditions were: 95°C for 10 min

198 followed by 45 cycles of 95°C for 10 s, 60°C for 15 s and 72°C for 30 s. Relative quantitation of

199 transcript levels was performed using the  $2^{-\Delta\Delta C_t}$  method (Livak & Schmittgen, 2001) and the

200 house-keeping gene U6. Data are presented either as mean percentage expression of the vehicle

201 control ± standard error of the mean (SEM) or mean percentage expression of LPS +vehicle

202 condition ± SEM. Statistical analysis for each experimental condition vs. the vehicle condition

203 was performed using a one-way repeated measures ANOVA followed by the Dunnet *post hoc*  
204 test (Lew, 2007) at the 5% significance level.

205

## 206 ENZYME LINKED IMMUNOSORBANT ASSAYS (ELISAs)

207

208 Cell culture supernatants were taken from BV2 microglia cells cultured in 24-well plates. The  
209 culture medium was removed and centrifuged for 30 seconds at 16000  $\times g$  to pellet any  
210 detached cells then 950  $\mu\text{L}$  was removed for analysis. The concentration of mouse IL-6 protein  
211 was determined in triplicate by 96-well plate format ELISAs (Invitrogen) following  
212 manufacturer's instructions. Data is presented as mean protein concentration  $\pm$  standard  
213 deviation (SD). Statistical analysis comparing the absolute absorbance values for each  
214 experimental condition vs. the vehicle control +LPS condition was performed using a  
215 Student's unpaired t-test assuming equal variances at the 5% significance level.

216

## 217 INHIBITION OF PROTEIN SYNTHESIS

218

219 Cells were treated to 500 ng/mL LPS and either vehicle control, 1  $\mu\text{M}$  SAHA or 500 nM  
220 apicidin, in the presence or absence of 1  $\mu\text{g/mL}$  cycloheximide (CHX) for 3 hours. Protein  
221 synthesis was assessed in the cells using a Click-iT<sup>®</sup> Plus O-propargyl-puromycin (OPP)  
222 Protein Synthesis Assay Kit (Molecular Probes, Life Technologies). Briefly, after 2.5 hours of  
223 drug treatments, Click-iT<sup>®</sup> OPP was added directly to each well to give a final concentration  
224 of 20  $\mu\text{M}$ . The cells were incubated for a further 30 minutes at 37°C. The culture medium was  
225 removed, the cells washed with PBS, followed by fixation with 100  $\mu\text{L}$  of 4% w/v  
226 paraformaldehyde (Sigma-Aldrich) for 15 minutes at room temperature. The cells were then  
227 permeabilised with 100  $\mu\text{L}$  of 0.5% v/v Triton X-100 (Sigma-Aldrich) for 15 minutes at room

228 temperature, washed twice with PBS and processed for imaging following the manufacturer's  
229 instructions. Imaging of labelled cells was carried out using the IncuCyte™ FLR with a 10×  
230 objective lens. Nine non-overlapping images were taken in phase-contrast and green-  
231 fluorescence (excitation wavelength of 450-490 nm) per well. RNA was extracted from parallel  
232 treated cultures for qRT-PCR analysis as described above.

233

## 234 **RESULTS**

235

### 236 HDAC INHIBITION SUPPRESSES CYTOKINE EXPRESSION IN BV2 MICROGLIA

237

238 Previous studies using isolated murine microglia report that non-selective HDAC inhibitors  
239 (SAHA, TSA and VPA) suppress LPS induced inflammation as measured by a reduction in  
240 LPS induced cytokine expression (tumour necrosis factor- $\alpha$ , TNF- $\alpha$  and interleukin-6, IL-  
241 6) (Suh et al., 2010; Kannan et al., 2013). The specific HDAC(s) important in microglia and  
242 neuroinflammation are still largely unknown though identification of the specific HDAC is a  
243 requisite for the development of any targeted therapy. We first tested the response of LPS  
244 activated BV2 microglia cells to the classical HDAC inhibitors SAHA and VPA (for a  
245 discussion of this model system see; (Bocchini et al., 1992; Horvath et al., 2008; Henn et al.,  
246 2009; Gresa-Arribas et al., 2012; Stansley et al., 2012)). Six hours after LPS stimulation, IL-  
247 6 and TNF- $\alpha$  mRNA expression was increased by  $3384 \pm 271\%$  and  $50990 \pm 5190\%$   
248 respectively (Fig 1A), and after 24 hours IL-6 protein secretion was increased by  $5406 \pm 439\%$   
249 (Fig 1F). BV2 cells express the class I HDACs, 1, 2 and 3 with highest levels of HDAC1 and  
250 lowest levels of HDAC3 (Fig 1B, C). Treatment with the HDAC inhibitors, SAHA and VPA  
251 produced an increase in the level of Histone H4 acetylation levels within 1 hr which was stable  
252 over a period of 24 hr (Fig 1D) suggesting these inhibitors provide rapid and stable HDAC

253 inhibition. Activation by LPS in the presence of either 1  $\mu$ M SAHA or 10 mM of VPA,  
254 produced a significantly reduced response in IL-6 mRNA expression by  $84.1 \pm 2.8\%$  ( $P =$   
255  $0.004$ ) and  $89.7 \pm 1.6\%$  respectively and TNF- $\alpha$  mRNA expression by  $59.7 \pm 3.2\%$  and  $77.9 \pm$   
256  $2.5\%$  respectively (Fig 1E). Furthermore, SAHA significantly suppressed the LPS induced  
257 increase in IL-6 protein secretion by  $85.6 \pm 2.5\%$  (Fig 1F).

258

259 In order to understand the role of specific HDACs in microglia and neuroinflammation, we  
260 tested HDAC inhibitors that show some selectivity towards specific HDAC isoforms in vitro.  
261 We treated LPS induced cells with 5  $\mu$ M MS-275 (which has reported selectivity for HDAC 1  
262 (Bradner et al., 2010)), 500 nM apicidin (which has reported selectivity for HDAC1, 2 and 3  
263 (Bradner et al., 2010)), or 1 $\mu$ M MI-192, (which has reported selectivity for HDAC2 and 3  
264 (Boissinot et al., 2012)). Treatment of BV2 cells with these inhibitors showed a rapid and stable  
265 increase in acetylated Histone H4 for apicidin but a gradual increase for MS-275 and MI-192  
266 over a 24 hour period (Fig 2A). Quantification of histone acetylation levels showed that  
267 apicidin produced a similar rate of increase to SAHA while MS-275 and MI-192 required  
268 longer incubation periods to induce high levels of histone acetylation (Fig 2B). MS-275 and  
269 MI-192 are members of the benzamide class of HDAC inhibitors which have previously been  
270 shown to bind HDACs with a slower association rate compared to hydroxamic acid inhibitors  
271 such as SAHA (Lauffer et al., 2013). Consistent with these data, co-treatment of LPS with  
272 apicidin was sufficient to reduce the induction of IL-6 and TNF- $\alpha$  expression by  $82.7 \pm 2.3\%$   
273 and  $50.3 \pm 4.5\%$  but co-treatment of MS-275 or MI-192 was not, (not shown). Pre-treatment  
274 of BV2 cells, to mitigate the slow kinetics of inhibition, with either apicidin, MI-912 or MS-  
275 275 for 24 hr prior to LPS stimulation significantly reduced the LPS stimulated expression of  
276 IL-6 and TNF- $\alpha$  (Fig 2C). Together these data suggest that HDAC1 and HDAC2/3 contribute  
277 to the inflammatory response in microglia.

278

279 KNOCKDOWN OF HDAC1 OR HDAC2 SUPPRESSES CYTOKINE EXPRESSION IN  
280 BV2 MICROGLIA

281

282 Although the HDAC inhibitors show selectivity, they are not isoform specific, therefore we  
283 used an siRNA approach to specifically knockdown HDAC1 and HDAC2 to determine their  
284 involvement in the inflammatory response of microglia. We were able to significantly knock-  
285 down HDAC1 protein expression by  $62.6 \pm 4.5\%$  (Fig 3A) and HDAC2 protein expression by  
286  $68.8 \pm 7.7\%$  (Fig 3A). Knockdown of HDAC1 resulted in an increased expression of HDAC2  
287 with no change in HDAC3 (Fig 3A), while knockdown of HDAC2 did not result in any change  
288 of expression of HDACs 1 or 3 (Fig 3A). Following knockdown, we treated cells to 500 ng/mL  
289 LPS for 6 hours and assessed the expression of IL-6 and TNF- $\alpha$  mRNA. We found, that cells  
290 in which HDAC1 was knocked down, there was no change in the response to LPS compared  
291 to control cells (not shown) but cells in which HDAC2 was knocked down showed a reduced  
292 induction of IL-6 (by  $48.2 \pm 13\%$ ) and TNF- $\alpha$  (by  $22.0 \pm 3.6\%$ ) expression in response to LPS  
293 (Fig 3B). To determine if the increase in HDAC2 expression, as a result of HDAC1  
294 knockdown, was acting as a compensatory mechanism we used HDAC1 siRNA to knockdown  
295 HDAC1 in combination with a titrated amount of HDAC2 siRNA to reduce HDAC2 to levels  
296 seen in control cells (Fig. 3, HDAC1 + 2). Using this approach we were able to significantly  
297 reduce HDAC1 levels by  $63.5 \pm 2.4\%$ , while maintaining the level of HDAC2 to that seen in  
298 control cells ( $89.7 \pm 6.2\%$ , Fig 3A HDAC1 + 2). The expression of HDAC3 was not  
299 significantly altered ( $116 \pm 5\%$  of Scr siRNA). Cells in which HDAC1 levels are reduced but  
300 HDAC2 levels are unchanged showed a reduced response to LPS with with IL-6 and TNF-  $\alpha$   
301 mRNA levels of  $34.8 \pm 3.0\%$  and  $35.7 \pm 4.8\%$  respectively compared with control cells (Fig  
302 3B).

303 In summary our data identify HDAC1 and 2 activities as important contributors to the  
304 neuroinflammatory response of microglia. Furthermore, they show redundancy in this function  
305 with increased HDAC2 levels being compensatory for reduced HDAC1.

306

307 HDAC INHIBITION IS EFFECTIVE IN REDUCING THE INFLAMMATORY RESPONSE  
308 IN THE ABSENCE OF NEW PROTEIN SYNTHESIS

309

310 The mechanism by which HDAC inhibitors exert their effects is often assumed to involve  
311 increase in gene expression – indeed HDAC inhibitors do result in increased histone acetylation  
312 (e.g. Fig 1D) and the association of increased acetylation with increased gene expression was  
313 first identified nearly 30 years ago (Hebbes et al., 1988). However recent proteomic data has  
314 identified in excess of 4000 proteins that are modified by acetylation (Choudhary et al., 2009;  
315 Lundby et al., 2012; Liu et al., 2014), a number comparable to targets of phosphorylation,  
316 suggesting that acetylation is involved in many more processes than gene regulation alone. To  
317 determine if the anti-inflammatory action of HDAC inhibition results from changes in gene  
318 expression we blocked new protein synthesis using cycloheximide and tested the effectiveness  
319 of HDAC inhibitors to block IL-6 and TNF- $\alpha$  stimulation by LPS. Incubation of BV2 cells with  
320 cycloheximide for 1 or 3 hours completely blocked new protein synthesis as measured by O-  
321 propargyl-puromycin incorporation and protein synthesis was blocked under all conditions  
322 used to quantify gene expression levels (Fig 4A). Continued exposure to cycloheximide for 6  
323 hr led to cell death (not shown) though cells were still healthy after 3 hour exposure. The  
324 presence of cycloheximide did not affect the induction of IL-6 mRNA expression by LPS (Fig  
325 4B, compare left two bars) and did not prevent either SAHA or apicidin inhibiting this response  
326 (Fig 4B, right two bars). Thus these data indicate that the mechanism by which HDAC  
327 inhibition reduces the inflammatory response in microglia is manifest within 3 hours and does

328 not require new protein synthesis. Together this suggests that increased gene expression  
329 resulting from enhanced histone acetylation is not important for ability of HDAC inhibitors to  
330 reduce microglia activation and future work should aim to identify the important molecular  
331 targets.

332 DISCUSSION

333

334 It has been previously shown that inhibitors of HDACs can reduce the inflammatory response  
335 in activated microglia (Chen and Greene, 2004; Faraco et al., 2009; Suh et al., 2010; Kannan  
336 et al., 2013) and by suppressing microglia activation show neuroprotective effects following  
337 transient ischaemia *in vivo* (Kim et al., 2007; Sinn et al., 2007; Xuan et al., 2012; Kim and  
338 Chuang, 2014). However, the identity of the important HDACs involved has not been  
339 uncovered and the mechanism by which HDAC inhibition is beneficial is yet to be elucidated.  
340 Here we have shown that the function of both HDAC1 and HDAC2 contribute to the  
341 inflammatory response in microglia and that in the absence of HDAC1, increased HDAC2  
342 levels compensate suggesting that these two HDACs show redundancy in this function.  
343 Furthermore the effectiveness of HDAC inhibition in the absence of new protein synthesis  
344 suggests that the HDACs are promoting the inflammatory response by regulating the  
345 acetylation levels of a non-histone protein rather than increasing levels of gene expression as a  
346 result of increased histone acetylation.

347

348 Microglia are often referred to as the immune cells of the brain and recently, selective inhibition  
349 and genetic knockdown of class I HDACs, was shown to reduce the production of cytokines in  
350 the inflammatory response of macrophages (Jeong et al., 2014). In macrophages, knockdown  
351 of either HDAC1 or 2 resulted in increased expression of the other and only a combined  
352 knockdown of HDACs 1, 2 and 3 resulted in reduced inflammatory response to LPS (Jeong et  
353 al., 2014). In T-lymphocytes deletion of HDAC1 resulted in an increase in HDAC2 protein  
354 levels but deletion of HDAC2 had no effect on HDAC1 (Dovey et al., 2013). Here we show  
355 that in microglial cells, HDAC1 is the most highly expressed class I HDAC and knockdown  
356 of HDAC1 resulted in a compensatory increase in the levels of HDAC2 (Fig 3A). Likewise,



357 we did not observe any compensatory increase in the levels of HDAC1 protein upon  
358 knockdown of HDAC2 (Fig 3A) however this contrasts to observations made using  
359 macrophages (Jeong et al., 2014). The mechanisms resulting in a compensatory increase in one  
360 HDAC upon loss of another are not known though HDAC1 does regulate its own promoter  
361 (Schuettengruber et al., 2003) and may also repress expression of other HDACs. One prediction  
362 of such a model would be that chemical inhibition of HDAC activity would also result in such  
363 compensatory increase. However, we did not observe any compensatory changes in HDAC  
364 expression in cells treated with HDAC inhibitors (not shown), suggesting it is not brought about  
365 by loss of HDAC enzyme activity but is potentially a mechanism involving the absence of the  
366 protein itself. In the absence of HDAC1 in T-lymphocytes the levels of SIN3 and MTA2 are  
367 reduced which may indicate that incomplete co-repressor complexes are turned over quickly  
368 (Dovey et al., 2013). This structural, rather than enzymatic, requirement for HDAC1 may  
369 underlie the reason that knockdown of HDAC1, but not inhibition results in a compensatory  
370 increase in HDAC2. Additionally, compensatory changes in HDAC protein levels have been  
371 observed in the absence of changes in mRNA levels, suggesting the mechanism involves  
372 enhanced translation or protein stability (Jurkin et al., 2011).

373

374 HDAC1 and 2 do not exist in the cell as isolated enzymes but are components of three  
375 independent co-repressor complexes; Sin3, NuRD and CoREST (for a review see (Kelly and  
376 Cowley, 2013)). Each co-repressor complex contains two molecules of HDAC which may  
377 consist of two molecules of HDAC1, two molecules of HDAC2 or one of each. Others have  
378 observed that upon a loss of HDAC1, HDAC2 can become incorporated into the Sin3, NuRD  
379 and CoREST multi-protein complexes in its place (Dovey et al., 2013). The compensatory  
380 effect of HDAC2 in the inflammatory response may be explained by such a mechanism.  
381 Following a loss of HDAC1, HDAC2 is upregulated and this HDAC is incorporated into a

382 specific complex in place of HDAC1. This complex, specifically targets a protein (which  
383 regulates the inflammatory response) for deacetylation. Regardless of the HDAC composition,  
384 be it two molecules of HDAC1, HDAC2 or one of each, the specificity for the substrate to be  
385 deacetylated comes from the complex itself rather than the HDACs. This hypothesis would  
386 suggest it doesn't matter which of the two HDAC isoforms is inhibited, an anti-inflammatory  
387 effect depends on a reduction in the number and activity of this specific functional multi-  
388 protein complex. Similarly, the compensatory effect of HDAC3 when HDAC1 and 2 are both  
389 lost in macrophages (Jeong et al., 2014) may be explained by HDAC3 being in a specific  
390 complex that targets the same substrate as the complex with either HDAC1 or 2. Further  
391 research is now needed to investigate these hypotheses and identify the complexes (and  
392 composition of them) that when inhibited is responsible for the suppression of pro-  
393 inflammatory mediator expression in BV2 microglia.

394

395 What is the important target of HDAC1 and 2 that promotes the inflammatory response? Our  
396 data identify that new protein synthesis is not required for the HDAC inhibitor response.  
397 Formally, we cannot rule out a transcriptional response involving increased miRNA expression  
398 and subsequent down regulation of a protein targeted by the miRNA(s), however the ability of  
399 the inhibitors to show effectiveness within 3 hours makes such a mechanism unlikely. HDAC  
400 enzymes were originally characterised by their ability to deacetylate histone proteins, however  
401 these are not their only target and the acetylome may contain on the order of 4000 proteins  
402 (Choudhary et al., 2009; Liu et al., 2014). Additionally, the original idea, that HDAC inhibition  
403 leads to increased histone acetylation and increased gene expression is likely too simplistic  
404 because as many genes are repressed as are activated upon HDAC inhibition by SAHA (Peart  
405 et al., 2005). The specific HDAC target(s) important for the microglial response has not been  
406 unequivocally identified though a number of potential target proteins can be implicated based

407 on a correlation of their acetylation with microglial activation. Perhaps the most studied non-  
408 histone protein involved in the inflammatory response and regulated by acetylation is the  
409 transcription factor NF- $\kappa$ B (Greene and Chen, 2004). Quiescent NF- $\kappa$ B is restricted to the  
410 cytoplasm via its inhibitory binding partner I $\kappa$ B but upon cell stimulation becomes dissociated  
411 and moves into the nucleus where it activates target gene expression. Initially, it was proposed  
412 that deacetylation of NF-  $\kappa$ B enhanced its interaction with I $\kappa$ B and removal from the nucleus  
413 however NF- $\kappa$ B can be acetylated at multiple sites and more recent data suggests that  
414 deacetylation at specific residues can result in activation of a subset of NF- $\kappa$ B targets  
415 (Rothgiesser et al., 2010), thus inhibition of HDACs may enhance the level of acetylated NF-  
416  $\kappa$ B, reducing its activity. In support of this idea, Furumai et al, 2011 showed that inhibition of  
417 HDACs in HeLa cells, with TSA, caused a reduction in the recruitment of NF- $\kappa$ B, and RNA  
418 polymerase II to the promoter of IL-8, which in turn caused a reduction in IL-8 expression  
419 (Furumai et al., 2011). Another candidate protein is MKP-1, a member of the MAPK  
420 inflammatory signalling pathway and negative regulator of the inflammatory response. In  
421 macrophages MKP-1 activity is reduced when it is deacetylated by HDAC1, 2 or 3 (Jeong et  
422 al., 2014). MKP-1 is not just expressed in macrophages but also in microglia (Eljaschewitsch  
423 et al., 2006) making this another attractive candidate for the functional response observed here.

424

425 In summary our new data here highlight a role for HDAC1 and 2 in regulating microglia  
426 activation and suggest the mechanism by which they do so involves acetylation of proteins  
427 other than histones. Future studies should now be aimed toward identifying which proteins are  
428 the important targets. Although HDAC inhibitors have been approved clinically in the  
429 treatment of some cancers they are not without side effects and a more complete understanding  
430 of their mechanism of action would open doors to more specific therapeutic targets.

431

432 **References**

- 433 Beckers T, Burkhardt C, Wieland H, Gimmnich P, Ciossek T, Maier T, Sanders K (2007)  
434 Distinct pharmacological properties of second generation HDAC inhibitors with the  
435 benzamide or hydroxamate head group. *International journal of cancer Journal*  
436 *international du cancer* 121:1138-1148.
- 437 Block ML, Zecca L, Hong JS (2007) Microglia-mediated neurotoxicity: uncovering the  
438 molecular mechanisms. *Nature reviews Neuroscience* 8:57-69.
- 439 Bocchini V, Mazzolla R, Barluzzi R, Blasi E, Sick P, Kettenmann H (1992) An immortalized  
440 cell line expresses properties of activated microglial cells. *Journal of neuroscience*  
441 *research* 31:616-621.
- 442 Boyes J, Byfield P, Nakatani Y, Ogryzko V (1998) Regulation of activity of the transcription  
443 factor GATA-1 by acetylation. *Nature* 396:594-598.
- 444 Bradner JE, West N, Grachan ML, Greenberg EF, Haggarty SJ, Warnow T, Mazitschek R  
445 (2010) Chemical phylogenetics of histone deacetylases. *Nat Chem Biol* 6:238-243.
- 446 Camelo S, Iglesias AH, Hwang D, Due B, Ryu H, Smith K, Gray SG, Imitola J, Duran G, Assaf  
447 B, Langley B, Khoury SJ, Stephanopoulos G, De Girolami U, Ratan RR, Ferrante RJ,  
448 Dangond F (2005) Transcriptional therapy with the histone deacetylase inhibitor  
449 trichostatin A ameliorates experimental autoimmune encephalomyelitis. *Journal of*  
450 *neuroimmunology* 164:10-21.
- 451 Chen LF, Greene WC (2004) Shaping the nuclear action of NF-kappaB. *Nat Rev Mol Cell Biol*  
452 5:392-401.
- 453 Chen PS, Wang CC, Bortner CD, Peng GS, Wu X, Pang H, Lu RB, Gean PW, Chuang DM,  
454 Hong JS (2007) Valproic acid and other histone deacetylase inhibitors induce  
455 microglial apoptosis and attenuate lipopolysaccharide-induced dopaminergic  
456 neurotoxicity. *Neuroscience* 149:203-212.
- 457 Choudhary C, Kumar C, Gnad F, Nielsen ML, Rehman M, Walther TC, Olsen JV, Mann M  
458 (2009) Lysine acetylation targets protein complexes and co-regulates major cellular  
459 functions. *Science* 325:834-840.
- 460 Dovey OM, Foster CT, Conte N, Edwards SA, Edwards JM, Singh R, Vassiliou G, Bradley A,  
461 Cowley SM (2013) Histone deacetylase 1 and 2 are essential for normal T-cell  
462 development and genomic stability in mice. *Blood* 121:1335-1344.
- 463 Eljaschewitsch E, Witting A, Mawrin C, Lee T, Schmidt PM, Wolf S, Hoertnagl H, Raine CS,  
464 Schneider-Stock R, Nitsch R, Ullrich O (2006) The endocannabinoid anandamide  
465 protects neurons during CNS inflammation by induction of MKP-1 in microglial cells.  
466 *Neuron* 49:67-79.
- 467 Faraco G, Pittelli M, Cavone L, Fossati S, Porcu M, Mascagni P, Fossati G, Moroni F, Chiarugi  
468 A (2009) Histone deacetylase (HDAC) inhibitors reduce the glial inflammatory  
469 response in vitro and in vivo. *Neurobiology of disease* 36:269-279.
- 470 Furumai R, Ito A, Ogawa K, Maeda S, Saito A, Nishino N, Horinouchi S, Yoshida M (2011)  
471 Histone deacetylase inhibitors block nuclear factor-kappaB-dependent transcription by  
472 interfering with RNA polymerase II recruitment. *Cancer Sci* 102:1081-1087.
- 473 Glass CK, Saijo K, Winner B, Marchetto MC, Gage FH (2010) Mechanisms underlying  
474 inflammation in neurodegeneration. *Cell* 140:918-934.
- 475 Glozak MA, Sengupta N, Zhang X, Seto E (2005) Acetylation and deacetylation of non-histone  
476 proteins. *Gene* 363:15-23.
- 477 Greene WC, Chen LF (2004) Regulation of NF-kappaB action by reversible acetylation.  
478 *Novartis Found Symp* 259:208-217; discussion 218-225.

- 479 Gresa-Arribas N, Vieitez C, Dentesano G, Serratos J, Saura J, Sola C (2012) Modelling  
480 neuroinflammation in vitro: a tool to test the potential neuroprotective effect of anti-  
481 inflammatory agents. *PloS one* 7:e45227.
- 482 Gu W, Roeder RG (1997) Activation of p53 Sequence-Specific DNA Binding by Acetylation  
483 of the p53 C-Terminal Domain. *Cell* 90:595-606.
- 484 Hebbes TR, Thorne AW, Crane-Robinson C (1988) A direct link between core histone  
485 acetylation and transcriptionally active chromatin. *EMBO J* 7:1395-1402.
- 486 Henn A, Lund S, Hedtjarn M, Schrattenholz A, Porzgen P, Leist M (2009) The suitability of  
487 BV2 cells as alternative model system for primary microglia cultures or for animal  
488 experiments examining brain inflammation. *Altx* 26:83-94.
- 489 Horvath RJ, Nutile-McMenemy N, Alkaitis MS, Deleo JA (2008) Differential migration, LPS-  
490 induced cytokine, chemokine, and NO expression in immortalized BV-2 and HAPI cell  
491 lines and primary microglial cultures. *Journal of neurochemistry* 107:557-569.
- 492 Hu E, Dul E, Sung CM, Chen Z, Kirkpatrick R, Zhang GF, Johanson K, Liu R, Lago A,  
493 Hofmann G, Macarron R, de los Frailes M, Perez P, Krawiec J, Winkler J, Jaye M  
494 (2003) Identification of novel isoform-selective inhibitors within class I histone  
495 deacetylases. *J Pharmacol Exp Ther* 307:720-728.
- 496 Jeong Y, Du R, Zhu X, Yin S, Wang J, Cui H, Cao W, Lowenstein CJ (2014) Histone  
497 deacetylase isoforms regulate innate immune responses by deacetylating mitogen-  
498 activated protein kinase phosphatase-1. *Journal of leukocyte biology* 95:651-659.
- 499 Jurkin J, Zupkovitz G, Lagger S, Grausenburger R, Hagelkruys A, Kenner L, Seiser C (2011)  
500 Distinct and redundant functions of histone deacetylases HDAC1 and HDAC2 in  
501 proliferation and tumorigenesis. *Cell Cycle* 10:406-412.
- 502 Kannan V, Brouwer N, Hanisch UK, Regen T, Eggen BJ, Boddeke HW (2013) Histone  
503 deacetylase inhibitors suppress immune activation in primary mouse microglia. *Journal*  
504 *of neuroscience research*.
- 505 Kelly RD, Cowley SM (2013) The physiological roles of histone deacetylase (HDAC) 1 and  
506 2: complex co-stars with multiple leading parts. *Biochem Soc Trans* 41:741-749.
- 507 Khan N, Jeffers M, Kumar S, Hackett C, Boldog F, Khramtsov N, Qian X, Mills E, Berghs SC,  
508 Carey N, Finn PW, Collins LS, Tumber A, Ritchie JW, Jensen PB, Lichenstein HS,  
509 Sehested M (2008) Determination of the class and isoform selectivity of small-  
510 molecule histone deacetylase inhibitors. *Biochem J* 409:581-589.
- 511 Kim HJ, Chuang DM (2014) HDAC inhibitors mitigate ischemia-induced oligodendrocyte  
512 damage: potential roles of oligodendrogenesis, VEGF, and anti-inflammation.  
513 *American journal of translational research* 6:206-223.
- 514 Kim HJ, Rowe M, Ren M, Hong JS, Chen PS, Chuang DM (2007) Histone deacetylase  
515 inhibitors exhibit anti-inflammatory and neuroprotective effects in a rat permanent  
516 ischemic model of stroke: multiple mechanisms of action. *J Pharmacol Exp Ther*  
517 321:892-901.
- 518 Lauffer BE, Mintzer R, Fong R, Mukund S, Tam C, Zilberleyb I, Flicke B, Ritscher A,  
519 Fedorowicz G, Vallero R, Ortwine DF, Gunzner J, Modrusan Z, Neumann L, Koth CM,  
520 Lupardus PJ, Kaminker JS, Heise CE, Steiner P (2013) Histone deacetylase (HDAC)  
521 inhibitor kinetic rate constants correlate with cellular histone acetylation but not  
522 transcription and cell viability. *The Journal of biological chemistry*.
- 523 Lew M (2007) Good statistical practice in pharmacology. Problem 2. *British journal of*  
524 *pharmacology* 152:299-303.
- 525 Liu Z, Wang Y, Gao T, Pan Z, Cheng H, Yang Q, Cheng Z, Guo A, Ren J, Xue Y (2014)  
526 CPLM: a database of protein lysine modifications. *Nucleic Acids Res* 42:D531-536.
- 527 Lundby A, Lage K, Weinert BT, Bekker-Jensen DB, Secher A, Skovgaard T, Kelstrup CD,  
528 Dmytriiev A, Choudhary C, Lundby C, Olsen JV (2012) Proteomic analysis of lysine

- 529 acetylation sites in rat tissues reveals organ specificity and subcellular patterns. *Cell*  
530 *Rep* 2:419-431.
- 531 Peart MJ, Smyth GK, van Laar RK, Bowtell DD, Richon VM, Marks PA, Holloway AJ,  
532 Johnstone RW (2005) Identification and functional significance of genes regulated by  
533 structurally different histone deacetylase inhibitors. *Proc Natl Acad Sci U S A*  
534 102:3697-3702.
- 535 Peng GS, Li G, Tzeng NS, Chen PS, Chuang DM, Hsu YD, Yang S, Hong JS (2005) Valproate  
536 pretreatment protects dopaminergic neurons from LPS-induced neurotoxicity in rat  
537 primary midbrain cultures: role of microglia. *Brain research Molecular brain research*  
538 134:162-169.
- 539 Rothgiesser KM, Fey M, Hottiger MO (2010) Acetylation of p65 at lysine 314 is important for  
540 late NF-kappaB-dependent gene expression. *BMC Genomics* 11:22.
- 541 Schuettengruber B, Simboeck E, Khier H, Seiser C (2003) Autoregulation of mouse histone  
542 deacetylase 1 expression. *Mol Cell Biol* 23:6993-7004.
- 543 Shein NA, Shohami E (2011) Histone deacetylase inhibitors as therapeutic agents for acute  
544 central nervous system injuries. *Molecular medicine* 17:448-456.
- 545 Simonini MV, Camargo LM, Dong E, Maloku E, Veldic M, Costa E, Guidotti A (2006) The  
546 benzamide MS-275 is a potent, long-lasting brain region-selective inhibitor of histone  
547 deacetylases. *Proceedings of the National Academy of Sciences of the United States of*  
548 *America* 103:1587-1592.
- 549 Sinn DI, Kim SJ, Chu K, Jung KH, Lee ST, Song EC, Kim JM, Park DK, Kun Lee S, Kim M,  
550 Roh JK (2007) Valproic acid-mediated neuroprotection in intracerebral hemorrhage via  
551 histone deacetylase inhibition and transcriptional activation. *Neurobiology of disease*  
552 26:464-472.
- 553 Stansley B, Post J, Hensley K (2012) A comparative review of cell culture systems for the  
554 study of microglial biology in Alzheimer's disease. *Journal of neuroinflammation*  
555 9:115.
- 556 Strahl BD, Allis CD (2000) The language of covalent histone modifications. *Nature* 403:41-  
557 45.
- 558 Suh HS, Choi S, Khattar P, Choi N, Lee SC (2010) Histone deacetylase inhibitors suppress the  
559 expression of inflammatory and innate immune response genes in human microglia and  
560 astrocytes. *J Neuroimmune Pharmacol* 5:521-532.
- 561 Suuronen T, Huuskonen J, Pihlaja R, Kyrylenko S, Salminen A (2003) Regulation of microglial  
562 inflammatory response by histone deacetylase inhibitors. *Journal of neurochemistry*  
563 87:407-416.
- 564 Xuan A, Long D, Li J, Ji W, Hong L, Zhang M, Zhang W (2012) Neuroprotective effects of  
565 valproic acid following transient global ischemia in rats. *Life sciences* 90:463-468.
- 566 Yao YL, Yang WM (2011) Beyond histone and deacetylase: an overview of cytoplasmic  
567 histone deacetylases and their nonhistone substrates. *J Biomed Biotechnol*  
568 2011:146493.
- 569 Zhang B, West EJ, Van KC, Gurkoff GG, Zhou J, Zhang XM, Kozikowski AP, Lyeth BG  
570 (2008) HDAC inhibitor increases histone H3 acetylation and reduces microglia  
571 inflammatory response following traumatic brain injury in rats. *Brain research*  
572 1226:181-191.
- 573 Zhang ZY, Schluesener HJ (2013) Oral Administration of Histone Deacetylase Inhibitor MS-  
574 275 Ameliorates Neuroinflammation and Cerebral Amyloidosis and Improves  
575 Behavior in a Mouse Model. *Journal of neuropathology and experimental neurology*  
576 72:178-185.

577 Zhang ZY, Zhang Z, Schluesener HJ (2010) MS-275, an histone deacetylase inhibitor, reduces  
578 the inflammatory reaction in rat experimental autoimmune neuritis. *Neuroscience*  
579 169:370-377.  
580

581 **Figure 1. Histone deacetylase (HDAC) inhibition suppress activation of cytokine**  
582 **expression in murine microglia.** A) BV2 microglia were stimulated with 500 ng/mL  
583 lipopolysaccharide (LPS) and mRNA expression of interleukin-6 (IL-6) and tumor necrosis  
584 factor- $\alpha$  (TNF- $\alpha$ ) was determined using qPCR. Relative transcript levels were normalized to  
585 the U6 gene and expressed as a percentage of the expression in control cells treated with  
586 vehicle. Shown are mean  $\pm$  SEM,  $n=3$ . B) Quantitative RT-PCR of RNA extracted from BV2  
587 cells. Expression levels expressed as a percentage of the U6 gene. Shown are mean  $\pm$  SEM,  
588  $n=3$  C) Western blot analysis of protein extracted from BV2 cells and analysed using anti-  
589 HDAC1, HDAC2, HDAC3 and  $\beta$ -actin. Representative blots are shown and positions of  
590 molecular weight markers are identified on the left. D) Histone proteins were extracted from  
591 control cells and cells treated with 1  $\mu$ M SAHA or 10 mM VPA for 1, 2, 4, 6, or 24hr. Proteins  
592 underwent western blotting for acetylated histone H4 (Ac-H4) and total histone H3.  
593 Representative blots are shown. E) BV2 microglia were treated with 500 ng/mL LPS  $\pm$  1 mM  
594 SAHA or 5 mM valproic acid (VPA) for 6 hours and the mRNA expression of IL-6 and TNF-  
595  $\alpha$  was determined using qPCR, normalized to the U6 house-keeping gene and expressed as a  
596 percentage of the expression in control cells treated LPS and vehicle shown are mean  $\pm$  sem,  
597  $n=3$ . F) BV2 microglia were treated with 500 ng/mL LPS  $\pm$  1 mM SAHA for 24 hours and the  
598 changes in IL-6 protein secretion was determined by ELISA. Shown are mean protein  
599 concentration  $\pm$  SEM,  $n=3$ ). \* $P < 0.05$ , \*\* $P < 0.01$ , \*\*\* $P < 0.001$ .

600 **Figure 2. Selective Histone deacetylase (HDAC) inhibitors suppress activation of cytokine**  
601 **expression in murine microglia.** A) Histone proteins were extracted from control cells and  
602 cells treated with 500nM mM Apicidin, 1 $\mu$ M MI-192 or 5 $\mu$ M MS-275 for 1, 2, 4, 6, or 24hr.  
603 Proteins underwent western blotting for acetylated histone H4 (Ac-H4) and total histone H3.  
604 Representative blots are shown. B) Quantification of acetylated histone H4 levels, normalised  
605 to Histone H3 and expressed relative to acetylation levels at 24hr. C) BV2 microglia were



606 pretreated with HDACi for 24 hours and then stimulated with 500 ng/mL lipopolysaccharide  
607 (LPS) for 6 hours. mRNA expression of interleukin-6 (IL-6) and tumor necrosis factor- $\alpha$  (TNF-  
608  $\alpha$ ) was determined using qPCR. Relative transcript levels were normalized to the U6 house-  
609 keeping gene and expressed as a percentage of the expression in control cells treated with  
610 vehicle. Shown are mean  $\pm$  SEM,  $n=3$ . \* $P < 0.05$ , \*\* $P < 0.01$ , \*\*\* $P < 0.001$  compared to LPS  
611 stimulated cells.

612 **Figure 3. HDAC1 and HDAC2 are involved in the inflammatory response in microglia.**

613 A) BV2 microglia were transfected with either scrambled (Scr) siRNA or HDAC1, HDAC2 or  
614 HDACs1 and 2 siRNAs. Levels of HDAC1, 2 and 3 and Beta-actin were quantified by  
615 immunoblotting. Shown are a representative blots (left) and quantification of protein levels  
616 (right) expressed relative to levels in cells treated with Scrambled siRNA. Shown are mean  $\pm$   
617 SEM,  $n=3$  \* $p < 0.05$  compared to scrambled siRNA. B) BV2 microglia transfected with Scr,  
618 HDAC1, HDAC2 or HDAC1 and 2 siRNAs were stimulated with LPS and changes in IL-6  
619 and TNF- $\alpha$  mRNA expression was determined using qPCR. Relative transcript levels in each  
620 treatment were normalized to the U6 gene and expressed relative to the expression in the Scr  
621 siRNA +LPS. Shown are mean  $\pm$  SEM,  $n=3$ . \* $P < 0.05$

622 **Figure 4: Protein synthesis is not required for HDAC inhibitor efficacy.** A) BV2 microglia

623 were treated for 1 or 3 hours with or without cyclohexamide and incorporation of O-propargyl-  
624 puromycin (green, New protein) identified new protein synthesis. Bottom shows phase contrast  
625 images, scale bar 50  $\mu$ m. B) Expression of the IL-6 was measured by quantitative PCR in cells  
626 exposed to LPS and treated with vehicle, SAHA or apicidin in the presence of cyclohexamide.  
627 Transcript levels for each treatment were normalised to U6 and data shown are mean mRNA  
628 expression levels expressed as a percentage of the expression in LPS +vehicle  $\pm$  SEM,  $n=3$ ,  
629 \*\*\* $P < 0.001$  vs. LPS +vehicle

630

631 **Figure 1**

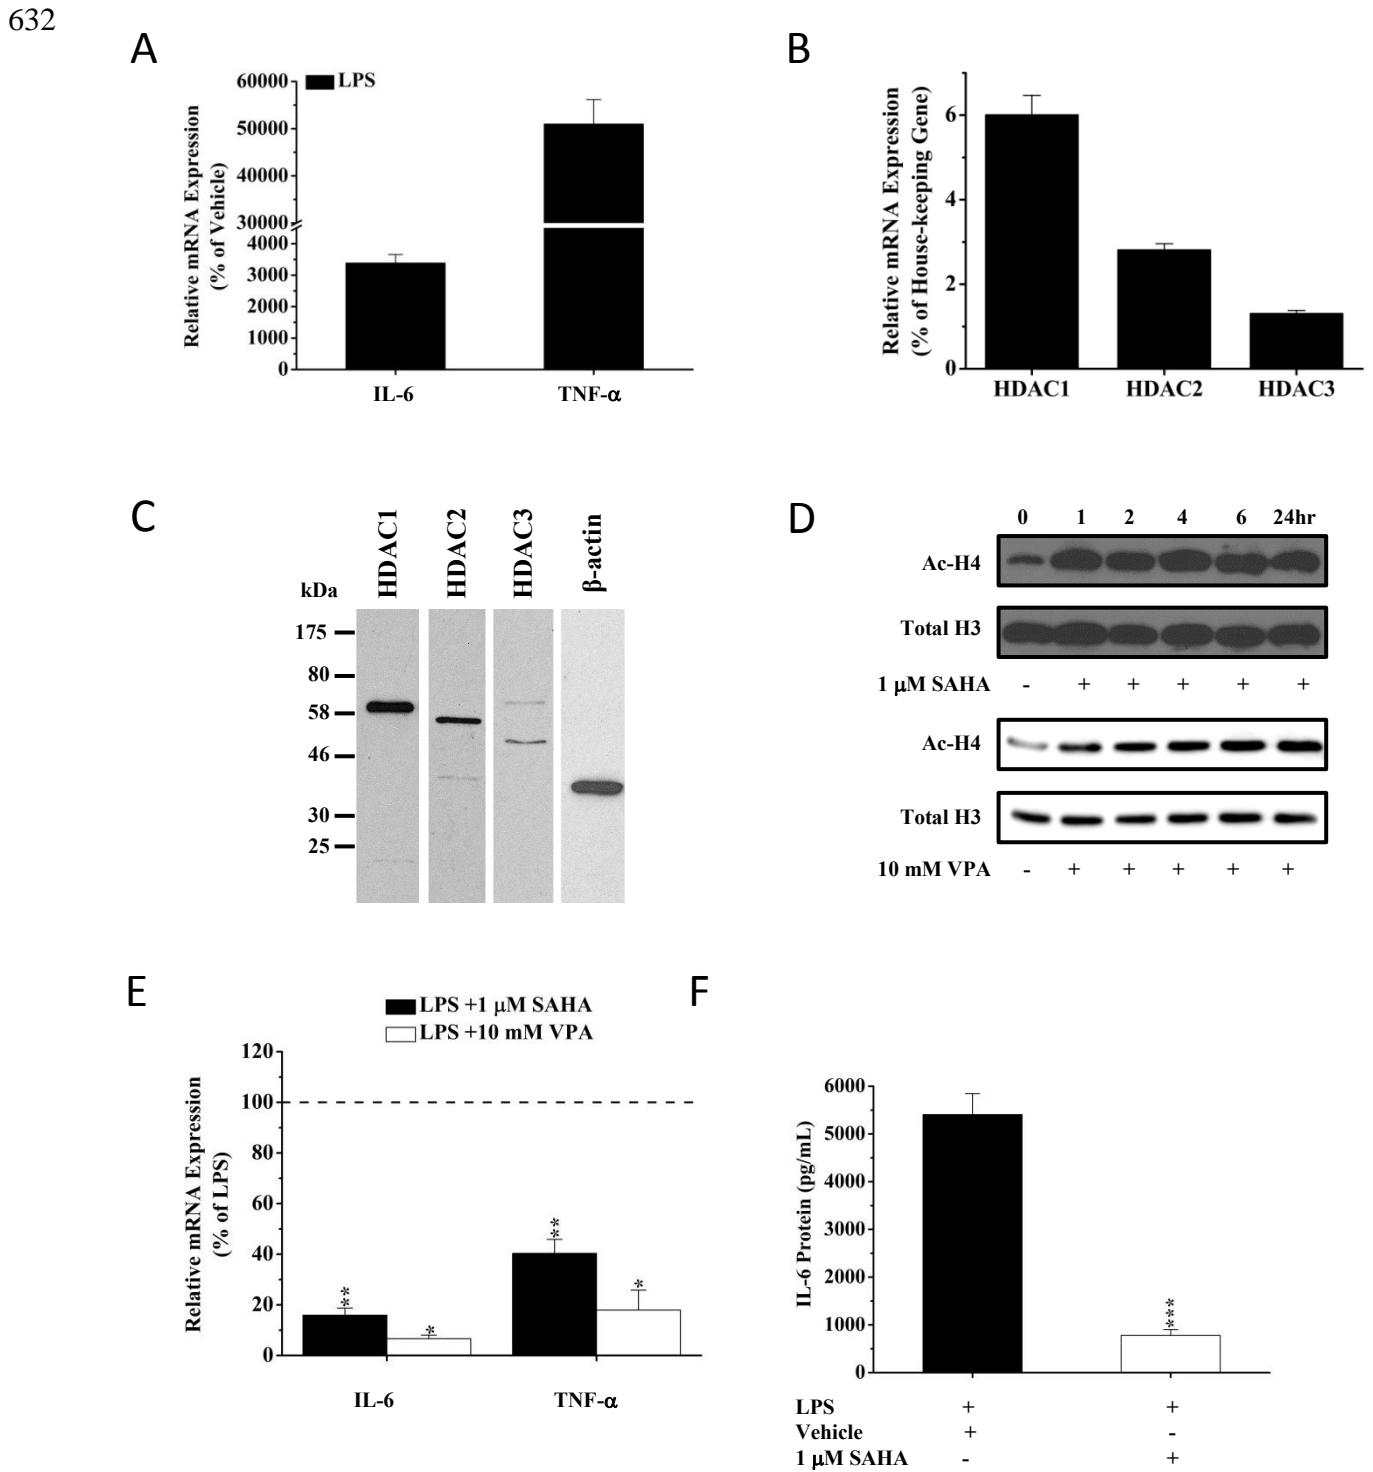

633 **Figure 2**

634

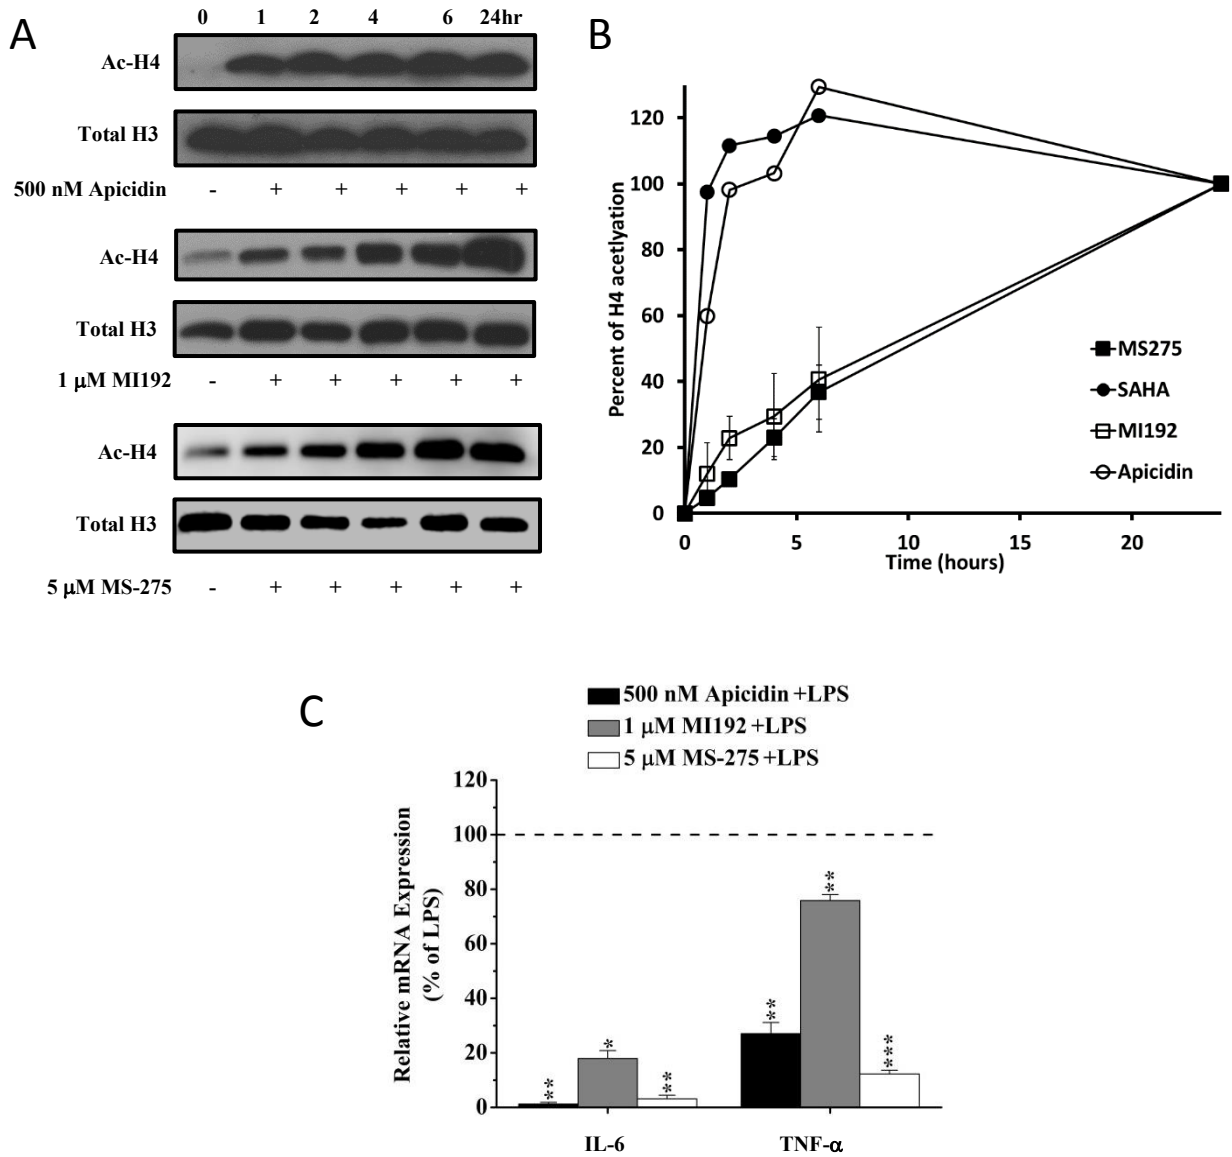

635 **Figure 3**

636

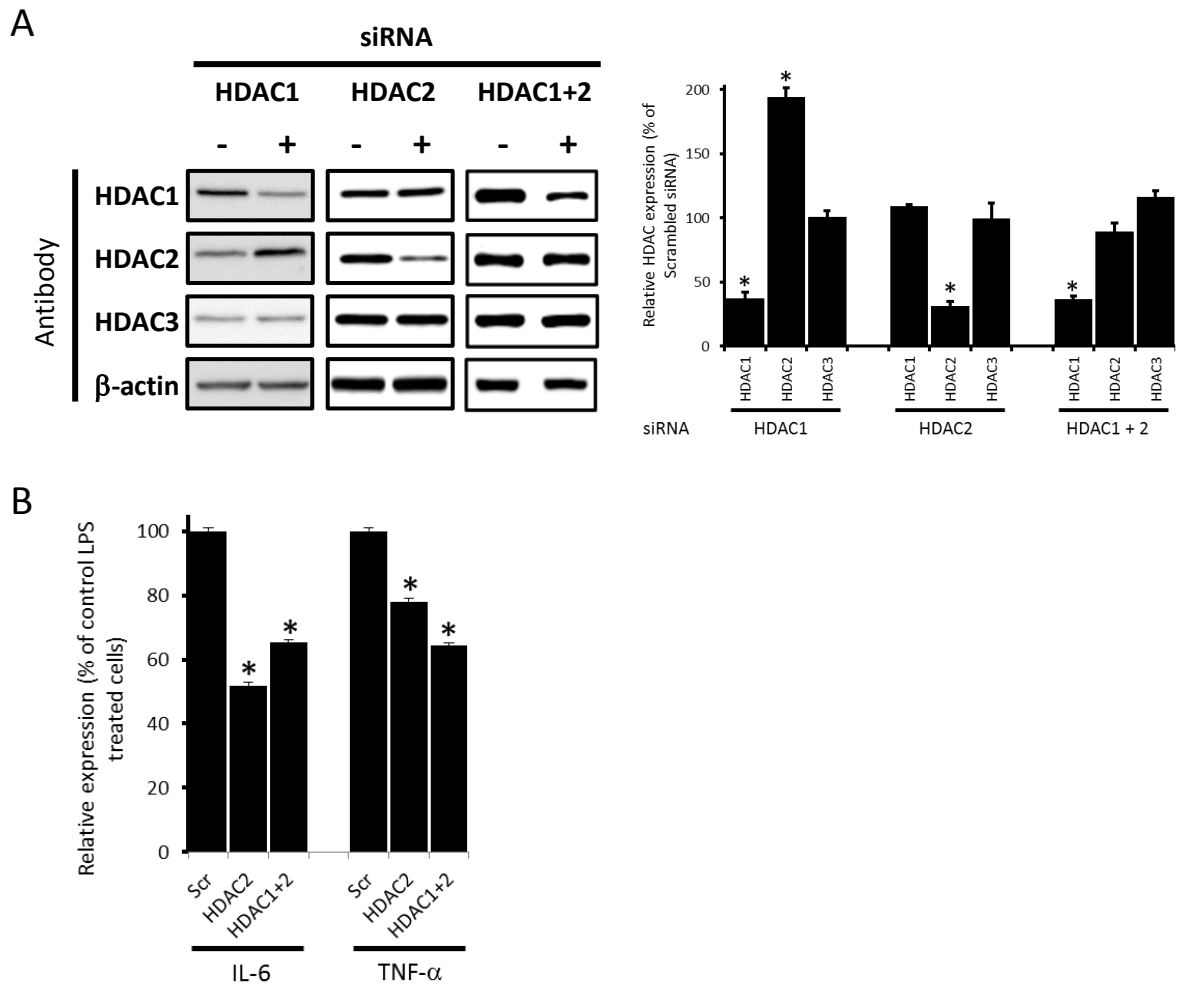

637 **Figure 4**

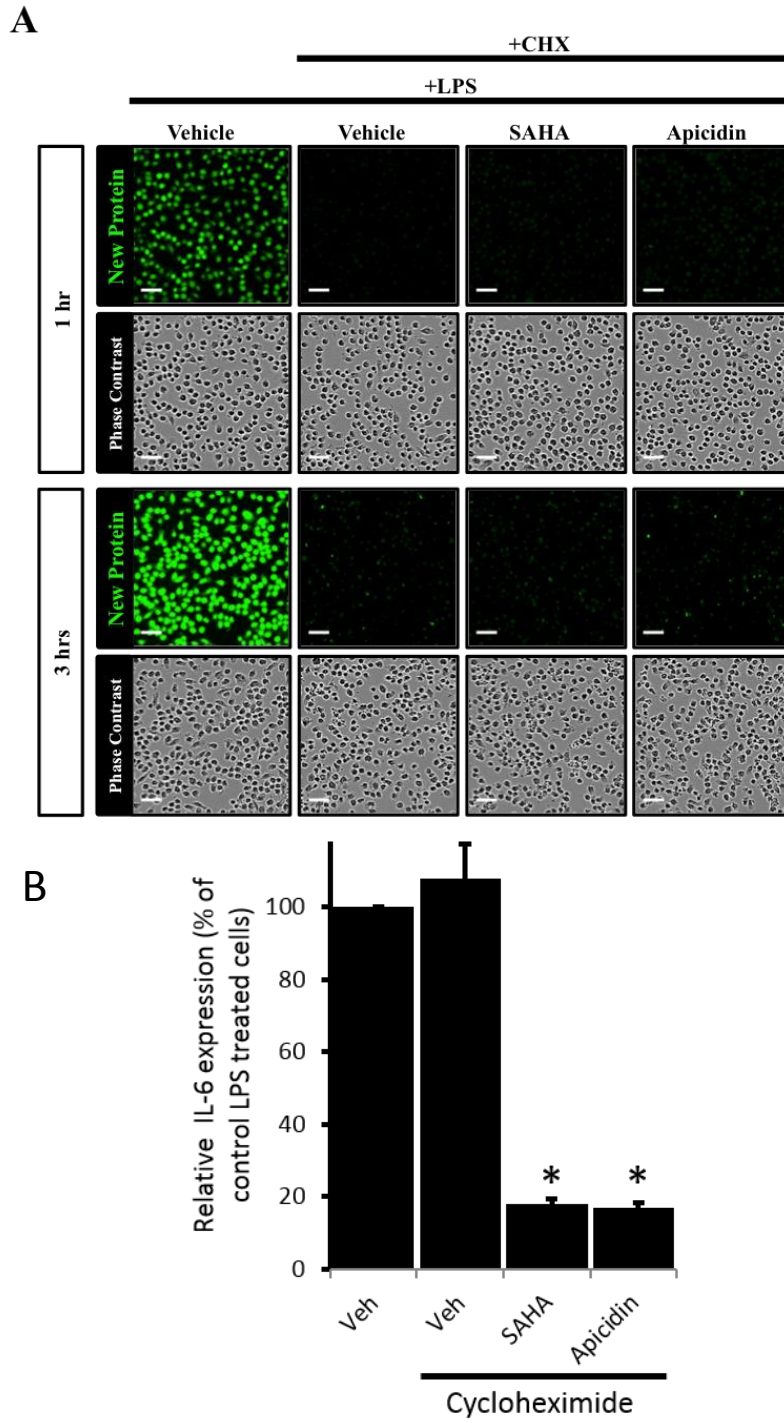

Source: http://biorxiv.org/content/10.1101/107649v1.full.pdf
